# Supplementary material for: Electrochemical Disinfection of Dental Implants Experimentally Contaminated with Microorganisms as a Model for Periimplantitis
Source: J Clin Med. 2020 Feb 9;9(2):475. doi: 10.3390/jcm9020475 (PMC7074531; doi:10.3390/jcm9020475)
Supplement: Supplementary file 1 [file jcm-09-00475-s001.pdf]

**Table S1.** Overview of disinfection experiments. Sample size and groups are given for organisms and treatment methods applied (n.d., not determined). Embedment methods used: silicone, polyurethane foam and bovine ribs.

| Microbial species                | Curette                                                     | Air abrasion                                                | BDD treatment                                                                                              |
|----------------------------------|-------------------------------------------------------------|-------------------------------------------------------------|------------------------------------------------------------------------------------------------------------|
| <b>Bacteria</b>                  |                                                             |                                                             |                                                                                                            |
| <i>B. pumilus</i>                | n.d.                                                        | n.d.                                                        | 3 independent biological replicates for 3 embedment methods and 4 time points <sup>a)</sup> , respectively |
| <i>B. subtilis</i>               | n.d.                                                        | n.d.                                                        | 3 independent biological replicates for 3 embedment methods and 4 time points <sup>a)</sup> , respectively |
| <i>E. faecalis</i>               | 3 independent biological replicates for 3 embedment methods | 3 independent biological replicates for 3 embedment methods | 3 independent biological replicates for 3 embedment methods and 4 time points <sup>b)</sup> , respectively |
| <i>R. mucosa</i>                 | n.d.                                                        | n.d.                                                        | 3 independent biological replicates for 3 embedment methods and 4 time points <sup>b)</sup> , respectively |
| <i>S. sanguinis</i>              | n.d.                                                        | n.d.                                                        | 3 independent biological replicates for 3 embedment methods and 3 time points <sup>b)</sup> , respectively |
| <i>S. epidermidis</i>            | n.d.                                                        | n.d.                                                        | 3 independent biological replicates for 3 embedment methods and 5 time points <sup>c)</sup> , respectively |
| <b>Yeasts</b>                    |                                                             |                                                             |                                                                                                            |
| <i>C. albicans</i>               | n.d.                                                        | n.d.                                                        | 3 independent biological replicates for 3 embedment methods and 5 time points <sup>c)</sup> , respectively |
| <i>C. dubliniensis</i>           | 3 independent biological replicates for 3 embedment methods | 3 independent biological replicates for 3 embedment methods | 3 independent biological replicates for 3 embedment methods and 4 time points <sup>c)</sup> , respectively |
| <b>Mixture of microorganisms</b> |                                                             |                                                             |                                                                                                            |
| Multi-species natural biofilm    | 3 independent biological replicates for 3 embedment methods | 3 independent biological replicates for 3 embedment methods | 3 independent biological replicates for 3 embedment methods and 4 time points <sup>b)</sup> , respectively |

<sup>a)</sup> 0, 10, 20, 30, 60 min

<sup>b)</sup> 0, 5, 10, 15 min

<sup>c)</sup> 0, 5, 10, 15, 20 min
